# Supplementary material for: The Effectiveness and Safety of Acupuncture on Suicidal Behavior: A Systematic Review
Source: MDPI journal article supplement (doi:10.3390/healthcare11070955), 2023-03-27
Supplement: s1 [file s1]

**Supplement Table S3. Major findings and safety data from included studies.**

| Study / Country / Study design                               | Sample size (included→analyzed) | Intervention                                                                  | Treatment duration (f/u)   | Major findings                                                                                                                                                                                                                            | Safety data                                                                                                                                                                                                                                               |
|--------------------------------------------------------------|---------------------------------|-------------------------------------------------------------------------------|----------------------------|-------------------------------------------------------------------------------------------------------------------------------------------------------------------------------------------------------------------------------------------|-----------------------------------------------------------------------------------------------------------------------------------------------------------------------------------------------------------------------------------------------------------|
| Wang (2014) / China / RCT                                    | 61(20:21:20)→55(19:16:20)       | TG1: EA+placebo pill; TG2: EA+SSRI; CG1: placebo EA+SSRI                      | 6 wk (4-wk post-treatment) | 1. CSRS: The CSRS recordings showed that, over the whole time period of the trial, no patients presented a risk of suicide. (Raw data not reported)                                                                                       | TG1: 2/19 (nausea), 2/19 (fatigue), 1/19 (itchy); TG2: 4/20 (stomach discomfort and nausea), 2/20 (sleepy during the day), 2/20 (menstrual change), 1/20 (forgetfulness); CG: 2/16 (eye discomfort), 4/16 (stomach discomfort and nausea), 1/20 (fatigue) |
| Yang (2014) and Yang et al. (2020) / China / CCT             | 60(35:25)→55(32:23)             | TG: EA; CG: SSRI                                                              | 8 wk (4-wk post-treatment) | 1. CSRS: The CSRS recordings showed that, over the whole time period of the trial, no patients presented a risk of suicide. (Raw data not reported)                                                                                       | TG: 4/32 (bleeding and hematoma around the site of needling); CG: 13/23 (dizziness, nausea, tremors, palpitations and dry mouth)                                                                                                                          |
| Li et al. (2018) / China / RCT                               | 93(31:31:31)→83(29:27:27)       | TG1: ROC+AA (magnetotherapy); TG2: ROC+AA (vaccaria seed); CG: ROC for stroke | 4 wk (4-wk post-treatment) | 1. Item 3 of HAMD-17 (Suicide): $0.52\pm0.51$ to $0.34\pm0.48$ (TG1<CG: $p<0.01$ , TG1<TG2: $p<0.01$ ) / $0.63\pm0.57$ to $1.00\pm0.39$ (TG2<CG: $p<0.01$ ) / $0.67\pm0.62$ to $1.15\pm0.66$                                              | None                                                                                                                                                                                                                                                      |
| Jin et al. (2019) / China / Before-after study               | 21→21                           | Acupuncture                                                                   | 3 mon                      | 1. CER (reduction of HAMD score): 90.48%; 2. Number of patients with suicidal ideation: 21 / 7; 3. BSSI: $38.90\pm4.43$ / $17.38\pm8.83$ ( $p<0.05$ )                                                                                     | NR                                                                                                                                                                                                                                                        |
| Pirnia et al. (2019) / Iran / single-case experimental study | 1                               | AA+methadone                                                                  | 4 wk                       | 1. Salivary cortisol (unclear unit and the timing of sampling): $30.67\pm1.23$ / $24.50\pm1.44$ ( $p<0.05$ ); 2. Suicidal ideation (unclear assessment tool): Raw data not reported, but described as significantly reduced ( $p<0.01$ ). | NR                                                                                                                                                                                                                                                        |
| Pirnia et al. (2019) / Iran / RCT                            | 24(12:12)→24(12:12)             | TG: AA+methadone; CG: Sham AA+methadone                                       | 4 wk                       | 1. Salivary cortisol sampled at random times among the three meals (unclear unit): $175\pm53$ / $183\pm69$ ( $p=0.006$ ); 2. BSSI: $10.38\pm0.85$ / $11.94\pm1.23$ ( $p=0.01$ )                                                           | NR                                                                                                                                                                                                                                                        |
| Pirnia et al. (2020) / Iran / single-case experimental study | 1                               | AA+ROC                                                                        | 4 wk                       | 1. BDI: $28.51\pm0.64$ / $26.32\pm0.83$ ( $p<0.05$ ); 2. BSSI: $31.12\pm0.37$ / $25.62\pm0.35$ ( $p<0.05$ ); 3. Salivary cortisol                                                                                                         | NR                                                                                                                                                                                                                                                        |

|                                |                     |                           |       |                                                                                           |    |
|--------------------------------|---------------------|---------------------------|-------|-------------------------------------------------------------------------------------------|----|
|                                |                     |                           |       | in morning (unclear unit): 17.95±0.29 / 14.74±0.24 (p<0.05)                               |    |
| Li et al. (2021) / China / RCT | 90(45:45)→90(45:45) | TG: EA+MT+ROC; CG: EA+ROC | 1 mon | 1. NGASR: 4.31±0.77 / 5.39±1.13 (p<0.05) (in TG); 7.37±1.76 to 5.39±1.13 (p<0.05) (in CG) | NR |
