# Supplementary material for: The Effectiveness and Safety of Acupuncture on Suicidal Behavior: A Systematic Review
Source: MDPI journal article supplement (doi:10.3390/healthcare11070955), 2023-03-27
Supplement: s1 [file s1]

**Supplement Table S2. Search strategies and the results (search date: 2022.09.07.)**

**Medline via PubMed**

|    | Searches                                                                                                                                                                                         | Results   |
|----|--------------------------------------------------------------------------------------------------------------------------------------------------------------------------------------------------|-----------|
| #1 | Suicide[MH] OR “Self Mutilation”[MH] OR self-harm OR self-poisoning OR self-injur* OR “Self Mutilation” OR “attempted suicide” OR suicid*                                                        | 127,217   |
| #2 | Acupuncture[MH] OR Acupressure[MH] OR “Acupuncture Therapy”[MH] OR “Acupuncture Points”[MH] OR acupunct* OR electroacupunct* OR electro-acupunct* OR acupoint* OR acupressure OR auriculotherapy | 41,266    |
| #3 | #1 AND #2                                                                                                                                                                                        | <b>44</b> |

**EMBASE via Elsevier**

|    | Searches                                                                                                                                                                                  | Results    |
|----|-------------------------------------------------------------------------------------------------------------------------------------------------------------------------------------------|------------|
| #1 | ‘suicidal behavior’/exp OR ‘suicide’/exp OR ‘automutilation’/exp OR self-harm OR self-poisoning OR self-injur* OR “Self Mutilation” OR “attempted suicide” OR suicid*                     | 174,074    |
| #2 | ‘acupuncture’/exp OR ‘acupuncture point’/exp OR ‘electroacupuncture’/exp OR ‘acupunct*’ OR ‘electroacupunct*’ OR ‘electro-acupunct*’ OR ‘acupoint*’ OR ‘acupressure’ OR ‘auriculotherapy’ | 64,752     |
| #3 | #1 AND #2                                                                                                                                                                                 | <b>180</b> |

**CENTRAL**

|    | Searches                                                                                          | Results   |
|----|---------------------------------------------------------------------------------------------------|-----------|
| #1 | MH descriptor: [Suicide] explode all trees                                                        | 1,503     |
| #2 | MH descriptor: [Self Mutilation] explode all trees                                                | 37        |
| #3 | self-harm OR self-poisoning OR self-injur* OR “Self Mutilation” OR “attempted suicide” OR suicid* | 8,740     |
| #4 | MH descriptor: [Acupuncture] explode all trees                                                    | 164       |
| #5 | MH descriptor: [Acupressure] explode all trees                                                    | 428       |
| #6 | MH descriptor: [Acupuncture Therapy] explode all trees                                            | 5,344     |
| #7 | MH descriptor: [Acupuncture Points] explode all trees                                             | 2,272     |
| #8 | acupunct* OR electroacupunct* or electro-acupunct* OR acupoint* OR acupressure OR auriculotherapy | 22,515    |
| #9 | (#1 OR #2 OR #3) AND (#4 OR #5 OR #6 OR #7 OR #8) in Trials                                       | <b>27</b> |

**CINAHL via EBSCO**

|    | Searches                                                                                                                                                                                                   | Results    |
|----|------------------------------------------------------------------------------------------------------------------------------------------------------------------------------------------------------------|------------|
| #1 | SU Suicide OR SU Self Mutilation OR TX self-harm OR TX self-poisoning OR TX self-injur* OR TX Self Mutilation OR TX attempted suicide OR TX suicid*                                                        | 92,437     |
| #2 | SU Acupuncture OR SU Acupressure OR SU Acupuncture Therapy OR SU Acupuncture Points OR TX acupunct* OR TX electroacupunct* OR TX electro-acupunct* OR TX acupoint* OR TX acupressure OR TX auriculotherapy | 38,370     |
| #3 | #1 AND #2                                                                                                                                                                                                  | <b>690</b> |

**AMED via EBSCO**

|    | Searches                                                                                                                                                                                                   | Results  |
|----|------------------------------------------------------------------------------------------------------------------------------------------------------------------------------------------------------------|----------|
| #1 | SU Suicide OR SU Self Mutilation OR TX self-harm OR TX self-poisoning OR TX self-injur* OR TX Self Mutilation OR TX attempted suicide OR TX suicid*                                                        | 1,987    |
| #2 | SU Acupuncture OR SU Acupressure OR SU Acupuncture Therapy OR SU Acupuncture Points OR TX acupunct* OR TX electroacupunct* OR TX electro-acupunct* OR TX acupoint* OR TX acupressure OR TX auriculotherapy | 12,505   |
| #3 | #1 AND #2                                                                                                                                                                                                  | <b>6</b> |

### PsycARTICLES via ProQuest

|    | Searches                                                                                                                                                                                         | Results    |
|----|--------------------------------------------------------------------------------------------------------------------------------------------------------------------------------------------------|------------|
| #1 | SU(Suicide) OR SU("Self Mutilation") OR self-harm OR self-poisoning OR self-injur* OR "Self Mutilation" OR "attempted suicide" OR suicid*                                                        | 20,175     |
| #2 | SU(Acupuncture) OR SU(Acupressure) OR SU("Acupuncture Therapy") OR SU("Acupuncture Points") OR acupunct* OR electroacupunct* OR electro-acupunct* OR acupoint* OR acupressure OR auriculotherapy | 408        |
| #3 | #1 AND #2                                                                                                                                                                                        | <b>120</b> |

### CNKI

|    | Searches                                                                                                                 | Results   |
|----|--------------------------------------------------------------------------------------------------------------------------|-----------|
| #1 | (SU='自杀'+ '自伤'+ 'suicide'+ 'self-harm') AND (SU='针'+ '鍼'+ '穴位按压'+ '耳穴'+ 'acupuncture'+ 'acupressure'+ 'auriculotherapy') | <b>13</b> |

### WanFang data

|    | Searches                                                                                                                                               | Results    |
|----|--------------------------------------------------------------------------------------------------------------------------------------------------------|------------|
| #1 | 主题:("自杀" or "自伤" or "suicide" or "self-harm") and 主题:("针" or "鍼" or "穴位按压" or "耳穴" or "acupuncture" or "acupressure" or "auriculotherapy") not 主题:(针对) | <b>515</b> |

### VIP

|    | Searches                                                                                                           | Results    |
|----|--------------------------------------------------------------------------------------------------------------------|------------|
| #1 | M=(自杀 or 自伤 or suicide or self-harm) AND M=(针 or 鍼 or 穴位按压 or 耳穴 or acupuncture or acupressure or auriculotherapy) | <b>473</b> |

### CiNii

|    | Searches                                                                                          | Results    |
|----|---------------------------------------------------------------------------------------------------|------------|
| #1 | (自殺 OR 自傷 OR suicide OR self-harm) AND (鍼 OR 压迫 OR acupuncture OR acupressure OR auriculotherapy) | <b>151</b> |

### OASIS

|    | Searches                 | Results  |
|----|--------------------------|----------|
| #1 | (자살 OR 자해) AND (침 OR 지압) | <b>0</b> |

### KISS

|    | Searches            | Results    |
|----|---------------------|------------|
| #1 | (자살 OR 자해) AND (침)  | 191        |
| #2 | (자살 OR 자해) AND (지압) | 0          |
| #3 | #1 AND #2           | <b>191</b> |

### KCI

|    | Searches           | Results |
|----|--------------------|---------|
| #1 | (자살 OR 자해) AND (침) | 41      |

|    |                     |           |
|----|---------------------|-----------|
| #2 | (자살 OR 자해) AND (지압) | 0         |
| #3 | #1 AND #2           | <b>41</b> |

#### RISS

|    | Searches            | Results   |
|----|---------------------|-----------|
| #1 | (자살 OR 자해) AND (침)  | 63        |
| #2 | (자살 OR 자해) AND (지압) | 0         |
| #3 | #1 AND #2           | <b>63</b> |

#### KMbase

|    | Searches                 | Results |
|----|--------------------------|---------|
| #1 | (자살 OR 자해) AND (침 OR 지압) | 0       |
